# Supplementary material for: ADC Benchmark Range for Correct Diagnosis of Primary and Recurrent Middle Ear Cholesteatoma
Source: Hindawi journal article supplement (doi:10.1155/2018/7945482), 2018-01-01
Supplement: f1 [file 7945482.f1.pdf]

## SUPPLEMENTARY MATERIAL

Supplementary Table 1. Table comparing studies reporting cholesteatoma vs non-cholesteatoma DWI and ADC values.

| Authors and Year        | N   | MRI (T) | Type of CH                          | ROI                                   | Considered Variable         | Range CH+                                       | Mean Value CH+         | Range CH-                                        | Mean Value CH-          | IOA  |
|-------------------------|-----|---------|-------------------------------------|---------------------------------------|-----------------------------|-------------------------------------------------|------------------------|--------------------------------------------------|-------------------------|------|
| Russo et al. 2017       | 100 | 1.5     | Primary + Recurrent vs Granulation  | Circular ( $\varnothing=1\text{mm}$ ) | ADC (UM=mm <sup>2</sup> /s) | 318×10 <sup>-6</sup><br>- 1265×10 <sup>-6</sup> | 859,4×10 <sup>-6</sup> | 1774×10 <sup>-6</sup><br>- 2658×10 <sup>-6</sup> | 2216,3×10 <sup>-6</sup> | 0.96 |
| Suzuki et al. 2014      | 29  | 3       | Primary vs Recurrent vs Granulation | Freehand                              | SIR                         | 1,42 – 5,18;<br>1,22 – 5,99                     | 3,75;<br>3,28          | 1,42 – 3,58                                      | 2,38                    | NA   |
| Lingam et al. 2013      | 56  | 1.5     | Primary + Recurrent vs Granulation  | Freehand                              | ADC (UM=mm <sup>2</sup> /s) | 539×10 <sup>-6</sup><br>- 858×10 <sup>-6</sup>  | 707 ×10 <sup>-6</sup>  | 1574×10 <sup>-6</sup><br>- 1982×10 <sup>-6</sup> | 1849×10 <sup>-6</sup>   | 0.97 |
| Thiriat et al. 2009     | 15  | 1.5     | CH vs Abscess                       | Freehand (A≈11mm <sup>2</sup> )       | ADC (UM=mm <sup>2</sup> /s) | 628×10 <sup>-6</sup><br>- 1054×10 <sup>-6</sup> | 903×10 <sup>-6</sup>   | 107×10 <sup>-6</sup><br>- 568×10 <sup>-6</sup>   | 415×10 <sup>-6</sup>    | NA   |
| Vercruyssen et al. 2006 | 20  | 1.5     | Primary                             | NA                                    | ADC (UM=mm <sup>2</sup> /s) | 664×10 <sup>-6</sup><br>- 1107×10 <sup>-6</sup> | 844×10 <sup>-6</sup>   | NA                                               | NA                      | NA   |

Legend: N = Number of patients included in the study; MRI = Magnetic Resonance Imaging; T = Tesla (field strength); ROI = Region Of Interest; CH = Cholesteatoma; IOA = Inter-Observer Agreement; ADC = Apparent Diffusion Coefficient;  $\varnothing$  = diameter; UM = Unit of Measurement; SIR = Signal/Intensity Ratio; NA = Not Available; A = Area.
